# Supplementary material for: Alternative Transmission Patterns in Independently Acquired Nutritional Cosymbionts of Dictyopharidae Planthoppers
Source: PubMed Central journal article supplement (PMC8406288; doi:10.1128/mbio.01228-21), 2021-08-31
Supplement: mbio.01228-21-sf002.pdf [file mbio.01228-21-sf002.pdf]

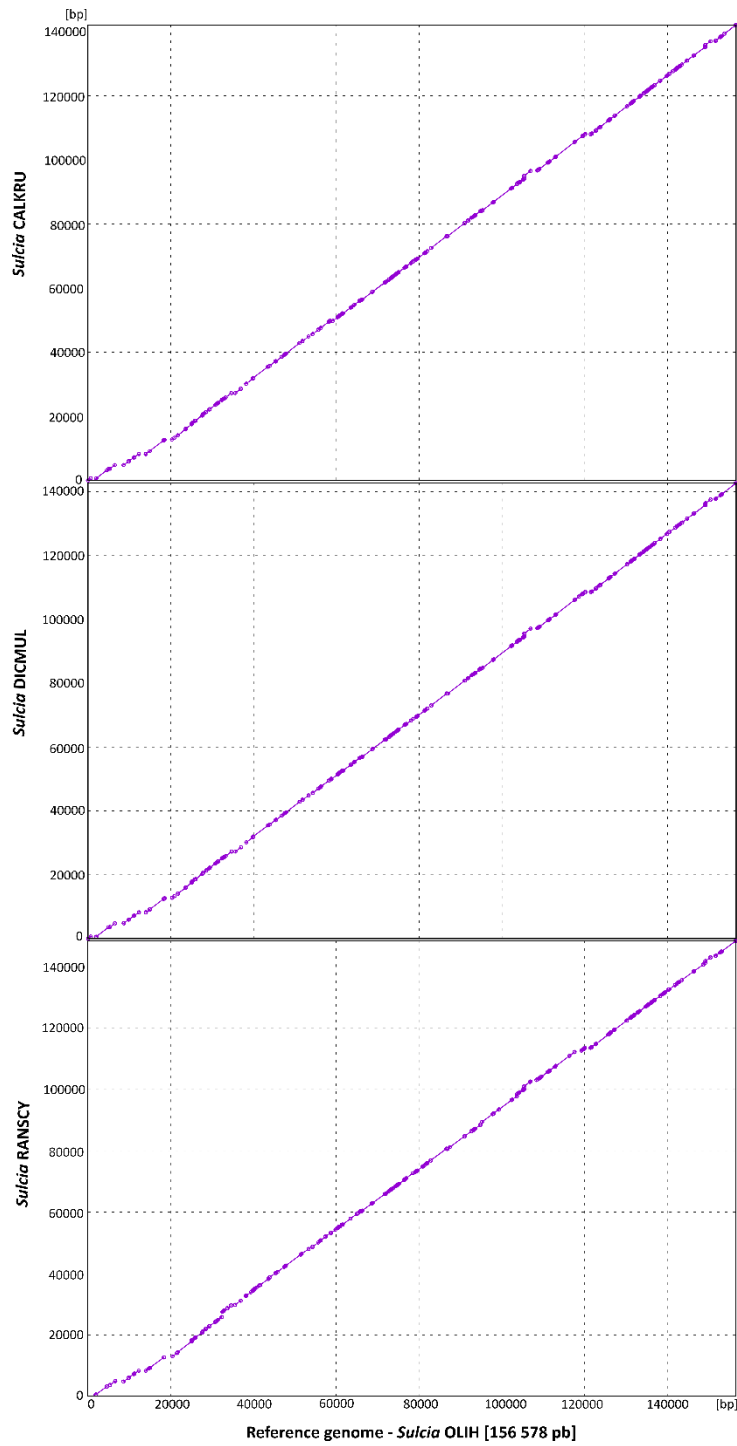

**Fig. S2A.** PROMER alignments of final *Sulcia* genomes from three Dictyopharidae species: *Callodictya krueperi* (CALKRU), *Dictyophara multireticulata* (DICMUL), and *Ranissus scytha* (RANSKY) against the *Sulcia* genome from *Oliarus filicicola* (OLIH; family Cixiidae).

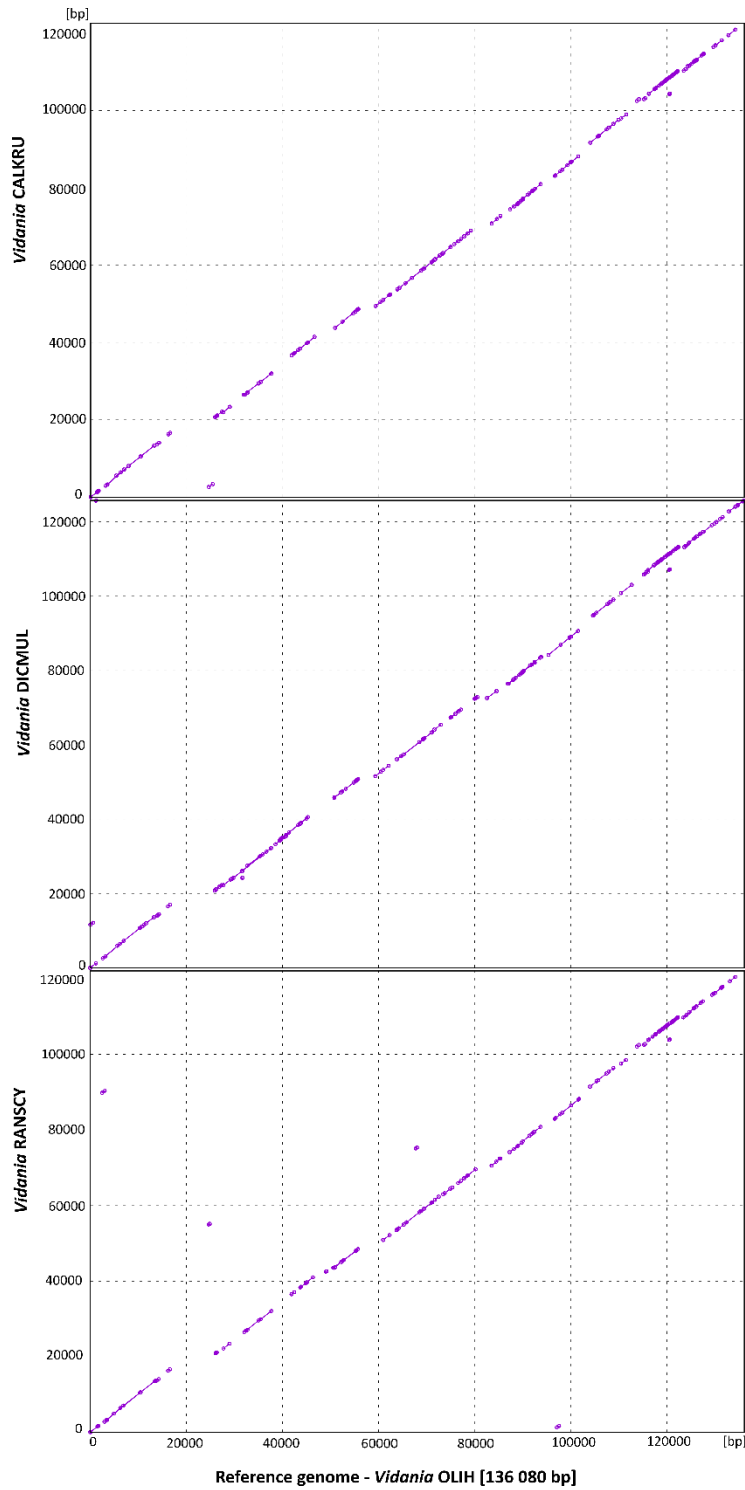

**Fig. S2B.** PROMER alignments of final *Vidania* genomes from three Dictyopharidae species: *Callodictya krueperi* (CALKRU), *Dictyophara multireticulata* (DICMUL), and *Ranissus scytha* (RANSCY) against the *Vidania* genome from *Oliarus filicicola* (OLIH; Cixiidae).
