# Supplementary material for: Alternative Transmission Patterns in Independently Acquired Nutritional Cosymbionts of Dictyopharidae Planthoppers
Source: PubMed Central journal article supplement (PMC8406288; doi:10.1128/mbio.01228-21), 2021-08-31
Supplement: mbio.01228-21-sf003.pdf [file mbio.01228-21-sf003.pdf]

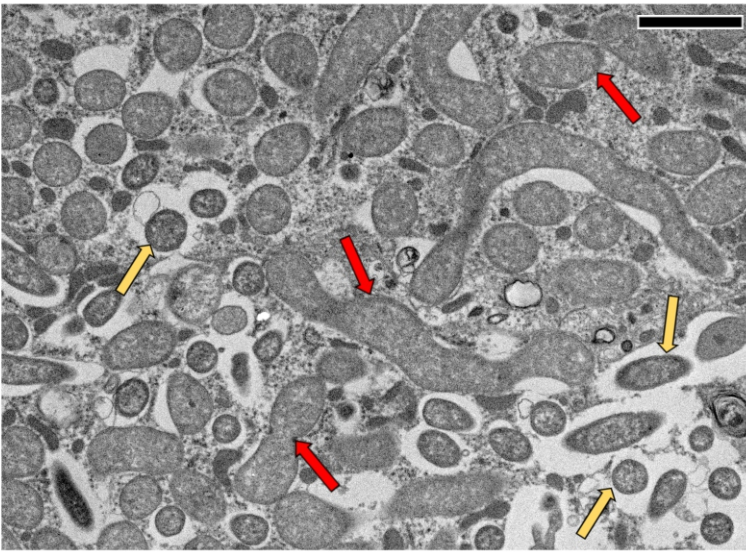

**Fig. S3A.** *Dictyophara pannonica*. Two morphotypes of *Sodalis* symbiont (red and yellow arrows) within bacteriome of single individuals. TEM, scale bar = 2 $\mu$ m

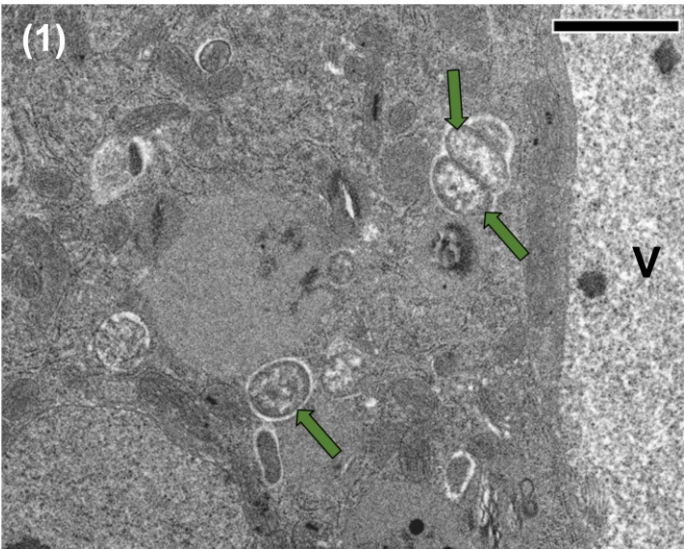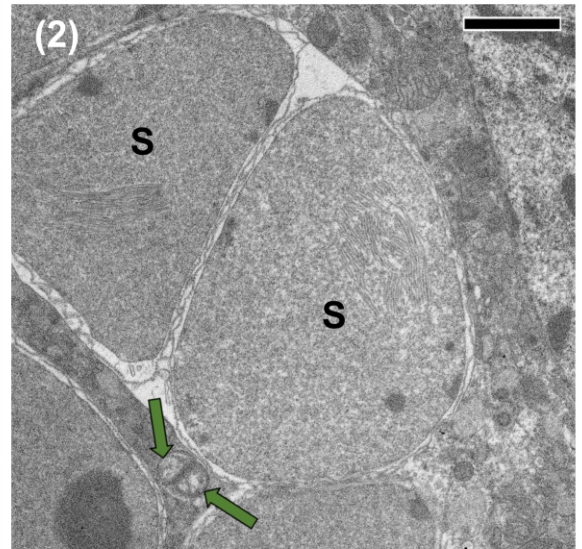

**Fig. S3B.** Distribution of *Wolbachia* symbiont in the Dictyopharidae species. Bacteria *Wolbachia* (green arrows) in the cytoplasm of the *Vidania* (1) and *Sulcia* (2) bacteriocytes. (1) *Callodictya krueperi*, (2). *Dictyophara europaea*. TEM, scale bar = 2  $\mu$ m. S - *Sulcia*, V - *Vidania*
